# Supplementary material for: Syntheses of microcrystalline cellulose-graft bottlebrush copolymer elastomers with hydrogen bonding interactions to endow applicable mechanical property
Source: Research Square preprint supplement (doi:10.21203/rs.3.rs-7302382/v1), 2025-10-26
Supplement: Supplementary file 1 [file 16def6b427f4e598408a531f.docx]

**Supplementary Information**

**Syntheses of microcrystalline cellulose-graft bottlebrush copolymer elastomers with hydrogen bonding interactions to endow applicable mechanical property**

*Wanyu Wang,* *Rou Chen, Xuehui Wang, Huanjuan Sun***, Zhigang Wang**

Shared first authorship: Wanyu Wang and Rou Chen contributed equally to this manuscript.

WY Wang, R Chen, XH Wang, HJ Sun

State Key Laboratory of Precision and Intelligent Chemistry, Department of Polymer Science and Engineering, University of Science and Technology of China, Hefei, Anhui 230026, P. R. China

Corresponding author: Huanjuan Sun, E-mail: shjjj@mail.ustc.edu.cn (HJ Sun)

ZG Wang

College of Materials Engineering, Fujian Agriculture and Forestry University, Fuzhou 350002, P. R. China

Corresponding author: Zhigang Wang, E-mail: zgwang@fafu.edu.cn (ZG Wang)

**Table S1.** Synthetic formulae and characteristics for MCC-*g*-P(*n*BA-*co*-*t*BA) graft copolymers.

| sample code*ᵅ* | feed molar ratio*ᵇ* | feed molar ratio of *n*BA to *t*BA | measured molar ratio of *n*BA to *t*BA*ᶜ* | *T*g*d* (oC) |
| --- | --- | --- | --- | --- |
| *t*BA350-MCC0.9 | 1/650/350 | 1.86/1 | 1.76/1 | -22.2 |
| *t*BA320-MCC0.9 | 1/680/320 | 2.13/1 | 1.98/1 | -24.7 |
| *t*BA300-MCC0.8 | 1/700/300 | 2.33/1 | 2.12/1 | -26.5 |
| *t*BA250-MCC0.9 | 1/750/250 | 3.0/1 | 2.79/1 | -30.3 |
| *t*BA220-MCC1.1 | 1/780/220 | 3.55/1 | 3.06/1 | -33.1 |

*ᵅ*Sample codes are defined as follows: the numbers behind “*t*BA”, and “MCC” stand for the molar numbersof *t*BA and MCC contents (percentage), respectively. *ᵇ*Molar ratio: MCC-BiB/*n*BA/*t*BA. *ᶜ*Measured by 1H NMR spectroscopy. *d*Measured by DSC.


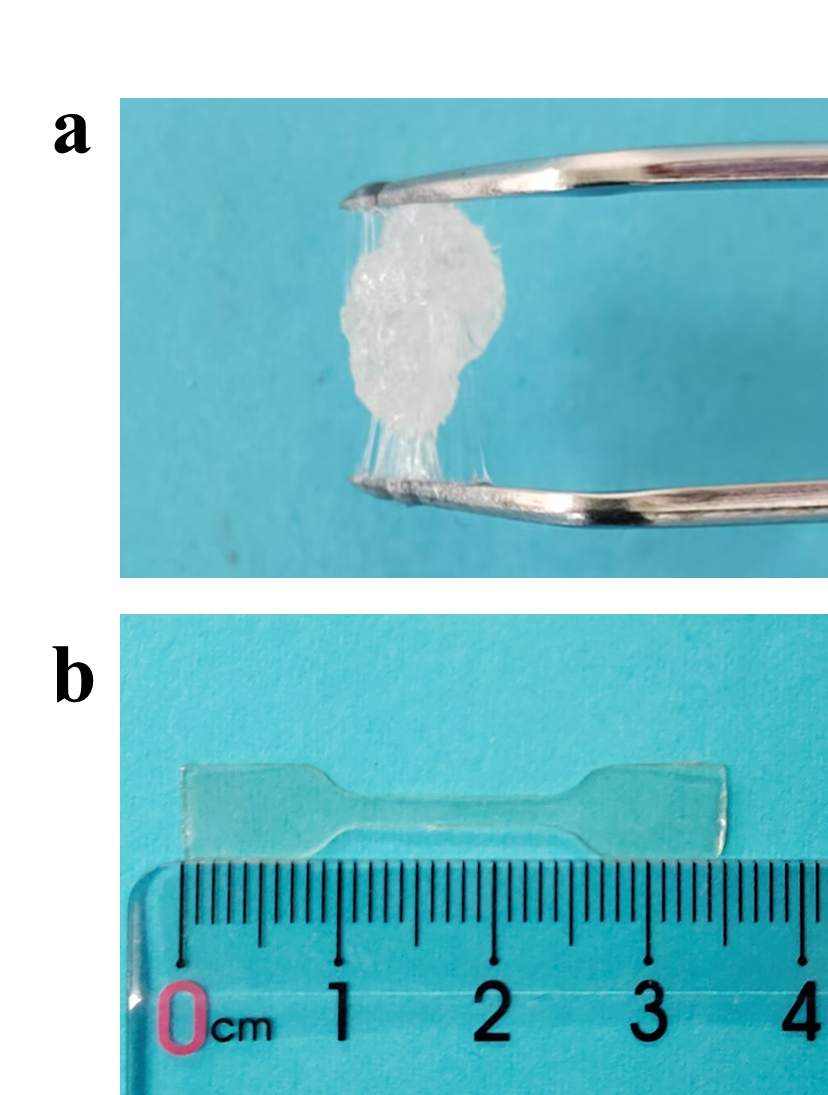


**Fig. S1.** Photos of *t*BA250-MCC0.9 (a) and dumbbell-shaped AA250-MCC0.9 (b) at room temperature.

**Fig. S2.** 1H NMR spectrum for MCC-BiB in DMSO-*d*6.

**
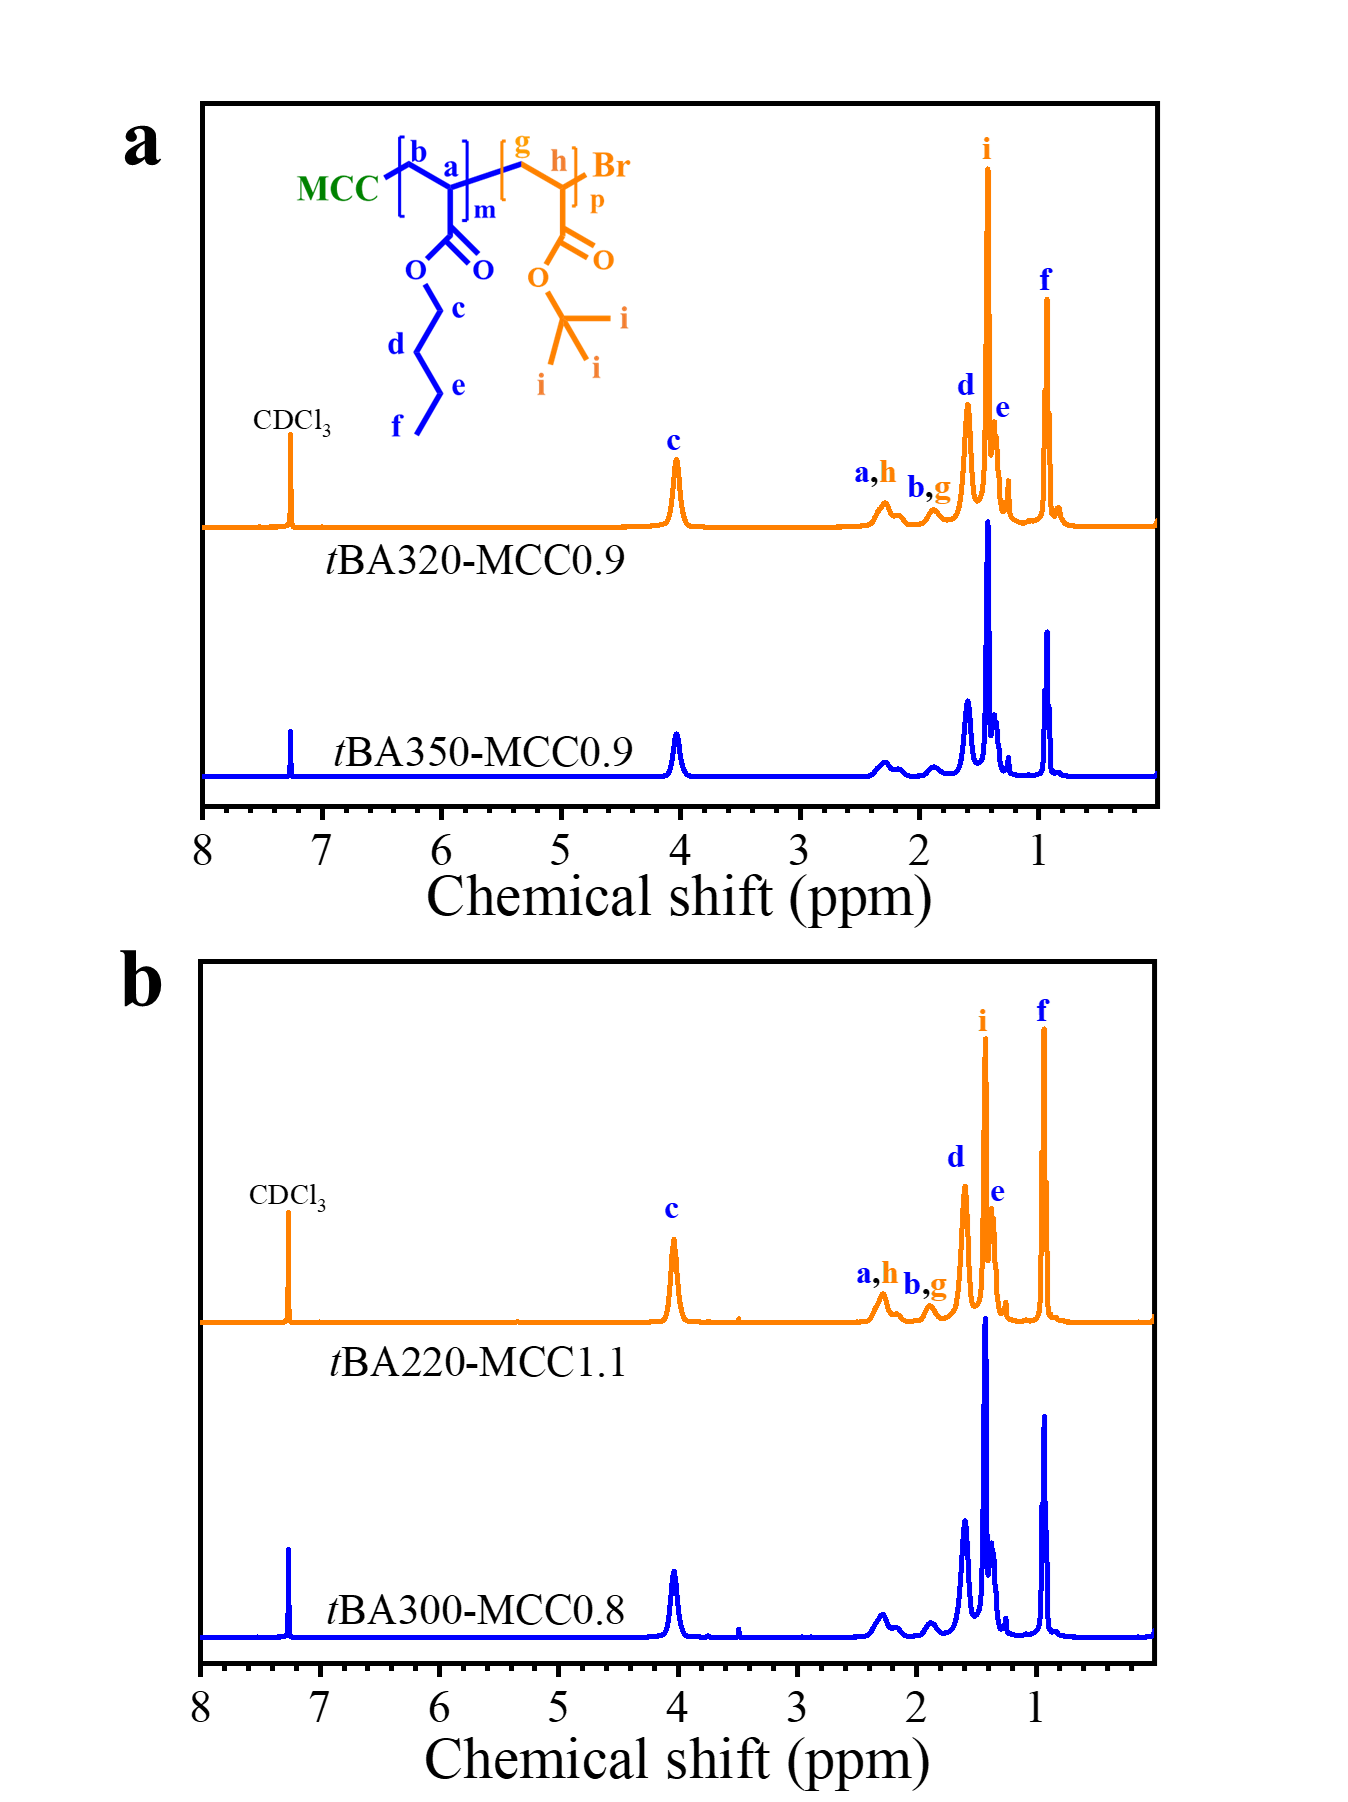
**

**Fig. S3.** 1H NMR spectra for MCC-*g*-P(*n*BA-*co*-*t*BA) in CDCl3, (a) *t*BA350-MCC0.9 and *t*BA320-MCC0.9 and (b) *t*BA300-MCC0.8 and *t*BA220-MCC1.1.


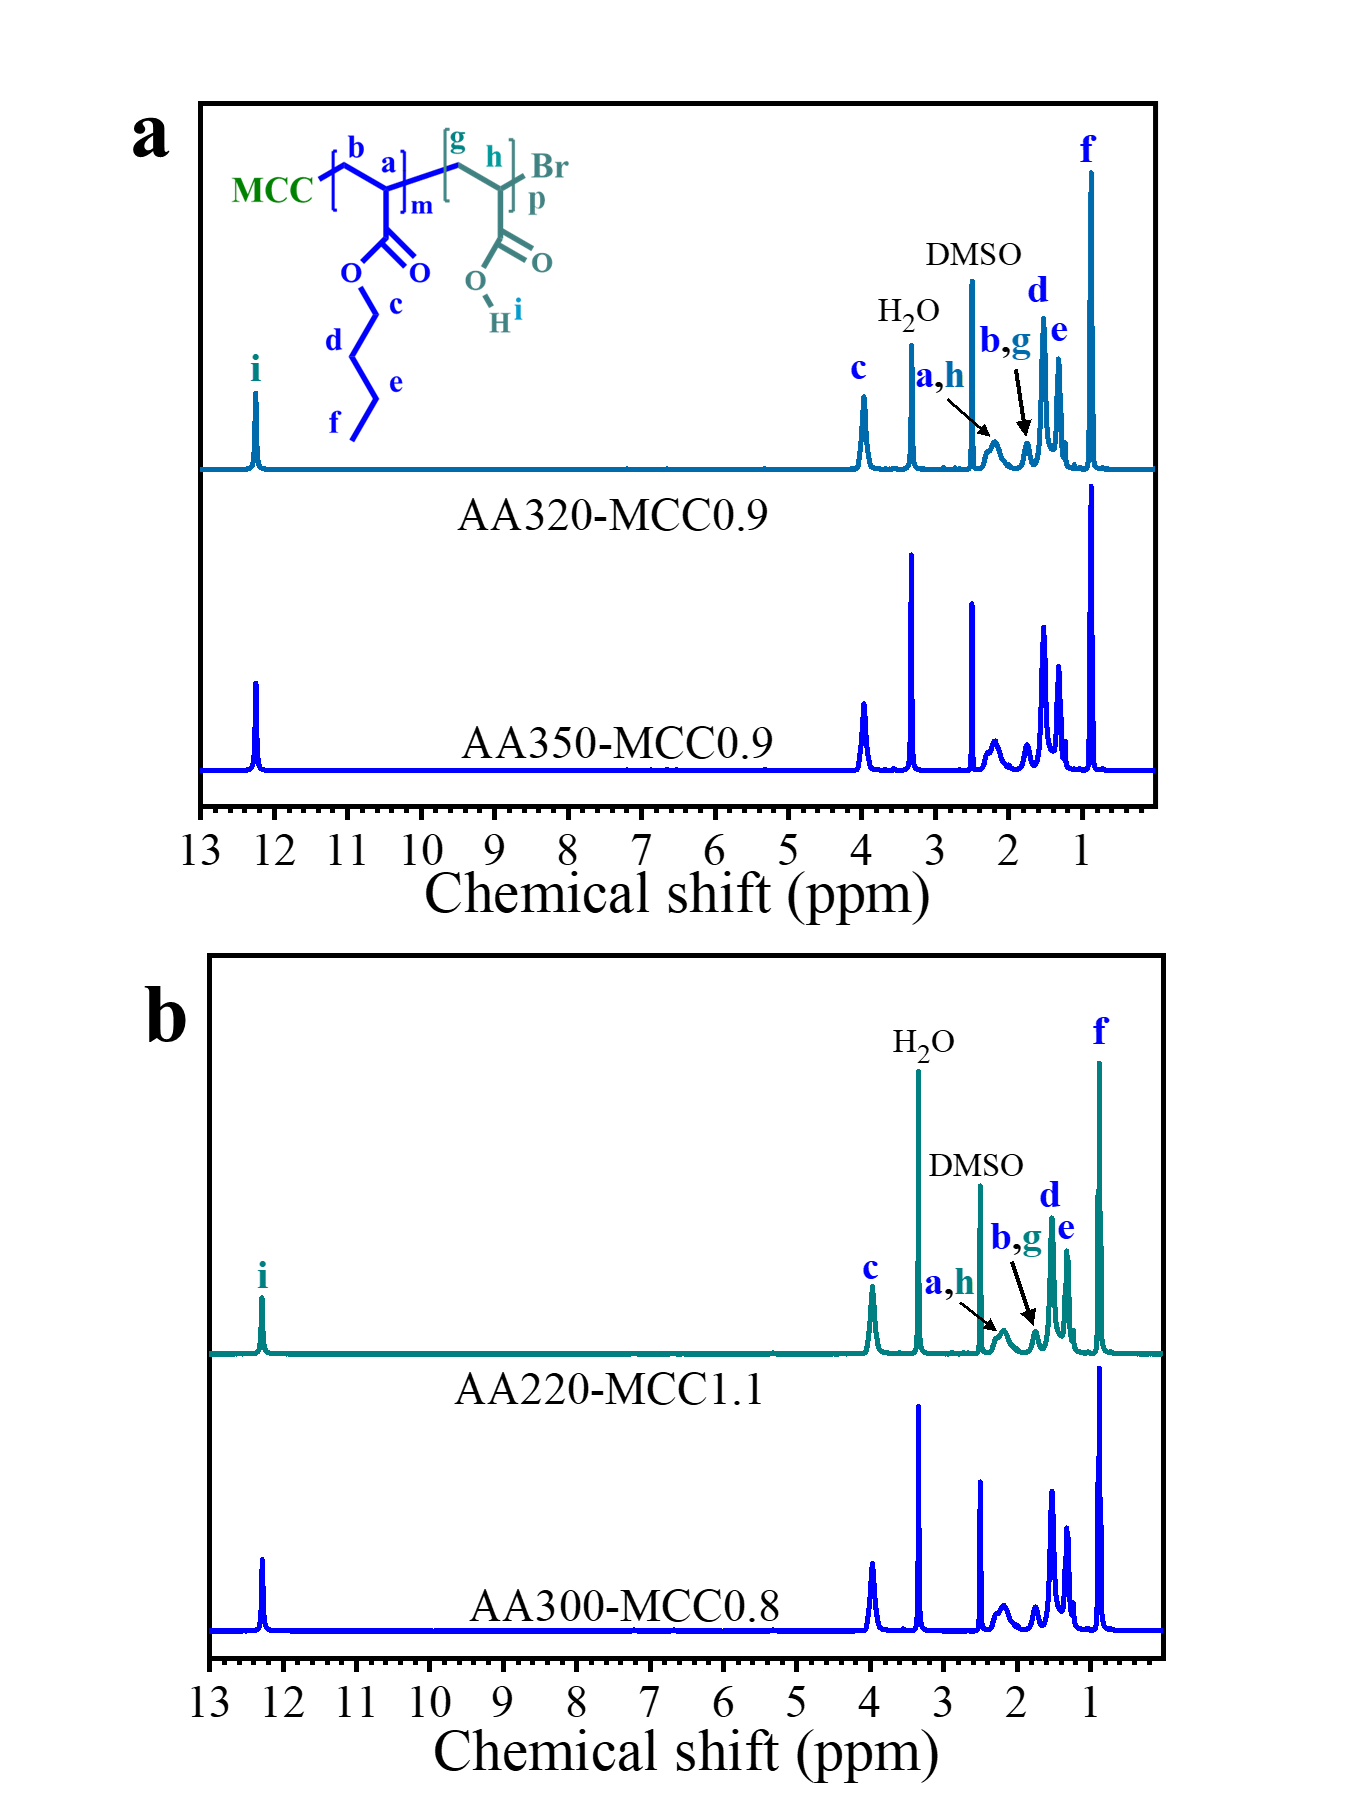


**Fig. S4.** 1H NMR spectra for MCC-*g*-P(*n*BA-*co*-AA) in DMSO-*d*6, (a) AA350-MCC0.9 and AA320-MCC0.9 and (b) AA300-MCC0.8 and AA220-MCC1.1.


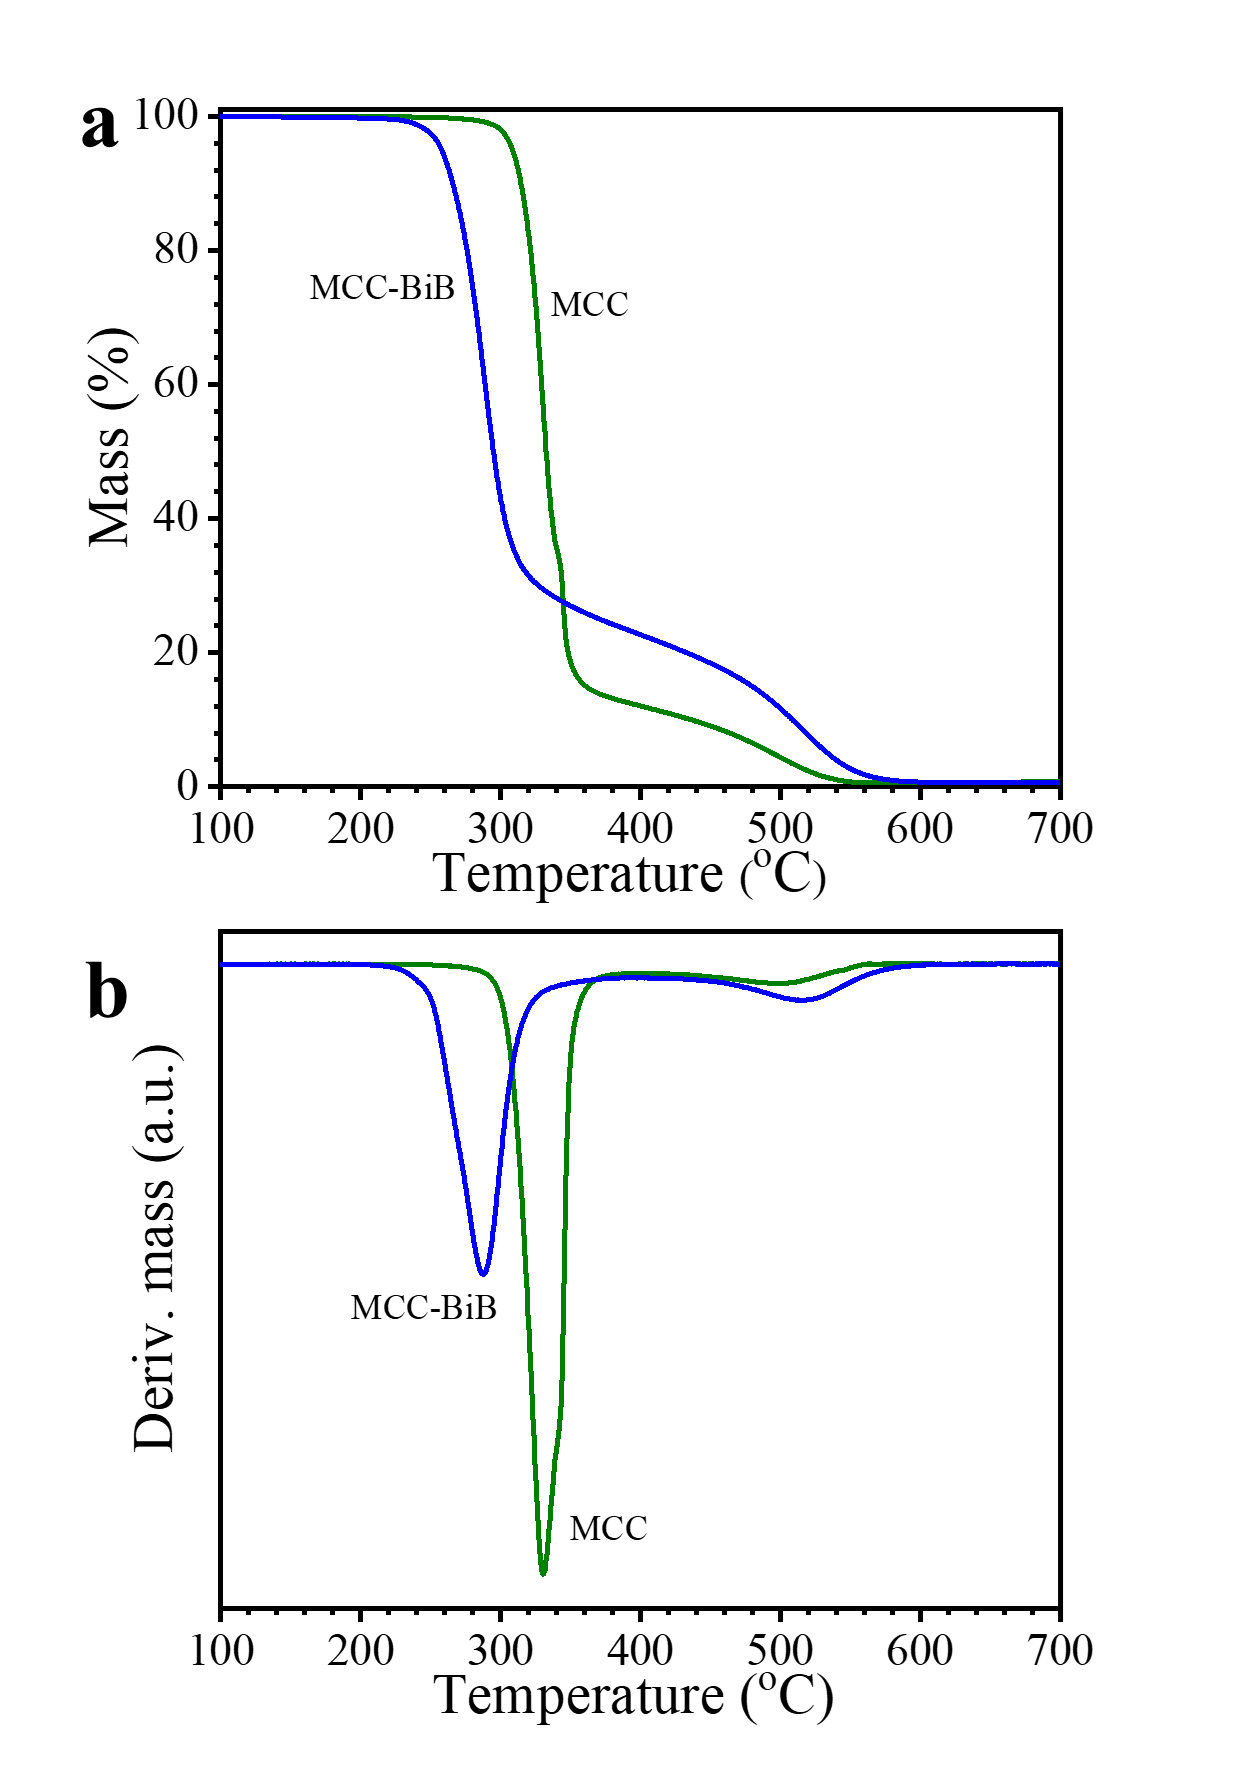


**Fig. S5.** Mass loss (a) and derivative mass loss curves (b) for MCC and MCC-BiB from TGA measurement.
